# Supplementary material
Source: publisher figshare collection journal article supplement (https://sage.figshare.com/ndownloader/files/13170392)
Supplement: Supplementary file 1 [file 13170392]

## Appendix B. General strain theory articles

Note: the 12 studies that examined empirically nonlinear strain effects are in bold font.

### 1992

1. **Agnew, R., & White, H. R. (1992). An empirical test of general strain theory. *Criminology*, 30(4), 475-500.**

### 1993

2. O'Connor, T. R. (1993). *Inequity and crime: An empirical assessment of general strain theory* (Doctoral dissertation, Indiana University of Pennsylvania).

### 1994

3. **Agnew, R. (1994). Delinquency and the desire for money. *Justice Quarterly*, 11(3), 411-427.**
4. Paternoster, R., & Mazerolle, P. (1994). General strain theory and delinquency: A replication and extension. *Journal of Research in Crime and Delinquency*, 31(3), 235-263.

### 1995

5. Meinzer, K. (1995). *An empirical test of general strain theory and drug use* (Doctoral dissertation, Ohio State University).

### 1996

6. Brezina, T. (1996). Adapting to strain: An examination of delinquent coping responses. *Criminology*, 34(1), 39-60.

### 1997

7. Agnew, R., & Brezina, T. (1997). Relational problems with peers, gender, and delinquency. *Youth & Society*, 29(1), 84-111.
8. Broidy, L. M. (1997). *General strain theory and sex differences in deviant outcomes* (Doctoral dissertation, Washington State University).
9. Broidy, L., & Agnew, R. (1997). Gender and crime: A general strain theory perspective. *Journal of Research in Crime and Delinquency*, 34(3), 275-306.
10. DeFronzo, J. (1997). Welfare and homicide. *Journal of Research in Crime and Delinquency*, 34(3), 395-406.

11. Griffin, R. (1997). *Constraints, coping methods, and general strain theory* (Doctoral dissertation, Washington State University).
12. Hoffmann, J. P., & Su, S. S. (1997). The conditional effects of stress on delinquency and drug use: A strain theory assessment of sex differences. *Journal of research in crime and delinquency*, 34(1), 46-78.
13. Mazerolle, P., & Piquero, A. (1997). Violent responses to strain: An examination of conditioning influences. *Violence and Victims*, 12(4), 323.

## 1998

14. Hinduja, S., & Patchin, J. W. (1998). Cyberbullying research summary: Cyberbullying and strain. *Educational Psychology*, 18(4), 433-444.
15. Hoffmann, J. P., & Miller, A. S. (1998). A latent variable analysis of general strain theory. *Journal of Quantitative Criminology*, 14(1), 83-110.
16. Hoffmann, J. P., & Su, S. S. (1998). Stressful life events and adolescent substance use and depression: Conditional and gender differentiated effects. *Substance Use & Misuse*, 33(11), 2219-2262.
17. Landau, S. F. (1998). Crime, subjective social stress and support indicators, and ethnic origin: The Israeli experience. *Justice Quarterly*, 15(2), 243-272.
18. Mazerolle, P. (1998). Gender, general strain, and delinquency: An empirical examination. *Justice Quarterly*, 15(1), 65-91.
19. Mazerolle, P., & Piquero, A. (1998). Linking exposure to strain with anger: An investigation of deviant adaptations. *Journal of Criminal Justice*, 26(3), 195-211.

## 1999

20. Agnew, R. (1999). A general strain theory of community differences in crime rates. *Journal of research in crime and delinquency*, 36(2), 123-155.
21. Alexander, A. (1999). *Conditional effects of strain in general strain theory: An analysis of racial differences* (Doctoral dissertation, Michigan State University).
22. Brezina, T. (1999). Teenage violence toward parents as an adaptation to family strain: Evidence from a national survey of male adolescents. *Youth & Society*, 30(4), 416-444.
23. **Hoffmann, J. P., & Cerbone, F. G. (1999). Stressful life events and delinquency escalation in early adolescence. *Criminology*, 37(2), 343-374.**

## 2000

24. Agnew, R., Rebellon, C. J., & Thaxton, S. (2000). A general strain theory approach to families and delinquency. In G. Fox & M. L. Benson (eds.), *Families, Crime, and Criminal Justice*. JAI Press (available at [https://papers.ssrn.com/sol3/papers.cfm?abstract\\_id=2859929](https://papers.ssrn.com/sol3/papers.cfm?abstract_id=2859929)).
25. Aseltine, R. H., & Gore, S. L. (2000). The variable effects of stress on alcohol use from adolescence to early adulthood. *Substance Use & Misuse*, 35(5), 643-668.
26. Aseltine Jr, R. H., Gore, S., & Gordon, J. (2000). Life stress, anger and anxiety, and delinquency: An empirical test of general strain theory. *Journal of Health and Social Behavior*, 256-275.
27. **Hoffmann, J. P., Cerbone, F. G., & Su, S. S. (2000). A growth curve analysis of stress and adolescent drug use. *Substance Use & Misuse*, 35(5), 687-716.**
28. Katz, R. S. (2000). Explaining girls' and women's crime and desistance in the context of their victimization experiences: A developmental test of revised strain theory and the life course perspective. *Violence Against Women*, 6(6), 633-660.
29. Mazerolle, P., Burton Jr, V. S., Cullen, F. T., Evans, T. D., & Payne, G. L. (2000). Strain, anger, and delinquent adaptations specifying general strain theory. *Journal of Criminal Justice*, 28(2), 89-101.
30. Mazerolle, P., & Maahs, J. (2000). General strain and delinquency: An alternative examination of conditioning influences. *Justice Quarterly*, 17(4), 753-778.
31. Piquero, N. L., & Sealock, M. D. (2000). Generalizing general strain theory: An examination of an offending population. *Justice Quarterly*, 17(3), 449-484.
32. Stiles, B. L., Liu, X., & Kaplan, H. B. (2000). Relative deprivation and deviant adaptations: The mediating effects of negative self-feelings. *Journal of Research in Crime and Delinquency*, 37(1), 64-90.
33. Teevan, J. J., & Dryburgh, H. B. (2000). First person accounts and sociological explanations of delinquency. *Canadian Review of Sociology*, 37(1), 77-93.
34. Van Wyk, J. A., Benson, M. L., & Harris, D. K. (2000). A test of strain and self-control theories: Occupational crime in nursing homes. *Journal of Crime and Justice*, 23(2), 27-44.

## 2001

35. Boardman, J. D., Finch, B. K., Ellison, C. G., Williams, D. R., & Jackson, J. S. (2001). Neighborhood disadvantage, stress, and drug use among adults. *Journal of Health and Social Behavior*, 151-165.

36. Brezina, T., Piquero, A. R., & Mazerolle, P. (2001). Student anger and aggressive behavior in school: An initial test of Agnew's macro-level strain theory. *Journal of Research in Crime and Delinquency*, 38(4), 362-386.
37. Broidy, L. M. (2001). A test of general strain theory. *Criminology*, 39(1), 9-36.
38. Capowich, G. E., Mazerolle, P., & Piquero, A. (2001). General strain theory, situational anger, and social networks: An assessment of conditioning influences. *Journal of Criminal Justice*, 29(5), 445-461.
39. Capowich, G., Mazerolle, P., & Piquero, A. (2001). The role of interpersonal networks in response to strain: Testing and extending general strain theory. *Journal of Criminal Justice*, 29, 445-62.
40. Castro, J. L. (2002). *The effect of neighborhood violence on individual violence: An empirical test of general strain theory* (Doctoral dissertation, University of Maryland).
41. Dingwell, H. (2001). *Criminal reactions to inequity: A test of general strain theory* (Doctoral dissertation, Washington State University).
42. Eddington, E. N. (2002). *Objective and subjective strain, anger, and deviant outcomes: An empirical test of Agnew's general strain theory* (Doctoral dissertation, Armstrong Atlantic State University).
43. Gibson, C. L., Swatt, M. L., & Jolicoeur, J. R. (2001). Assessing the generality of general strain theory: The relationship among occupational stress experienced by male police officers and domestic forms of violence. *Journal of Crime and Justice*, 24(2), 29-57.
44. Liu, X., & Kaplan, H. B. (2001). Role strain and illicit drug use: the moderating influence of commitment to conventional values. *Journal of Drug Issues*, 31(4), 833-856.
45. Merianos, D. E. (2001). *Joining the gang: A reaction to strain? A partial test of Agnew's general strain theory* (Doctoral dissertation, Sam Houston State University).
46. Maxwell, S. R. (2001). A focus on familial strain: Antisocial behavior and delinquency in Filipino society. *Sociological Inquiry*, 71(3), 265-292.
47. Ostrowsky, M. K. (2001). *Testing and integrated model of crime: Traditional and general strain, differential association, and control theories* (Doctoral dissertation, Florida Atlantic University).
48. Rogers, L. M. (2002). *Violent victimization and the general strain theory: An exploratory study* (Doctoral dissertation, University of South Carolina).

49. Sharp, S. F., Terling-Watt, T. L., Atkins, L. A., Gilliam, J. T., & Sanders, A. (2001). Purging behavior in a sample of college females: A research note on general strain theory and female deviance. *Deviant Behavior*, 22(2), 171-188.
50. Strugatz, E. L. (2001). *Gender, self-esteem, and delinquency: Using The National Longitudinal Study of Adolescent Health to test and extend Agnew's general strain theory* (Doctoral dissertation, North Carolina State University).
51. **Wright, J. P., Cullen, F. T., Agnew, R. S., & Brezina, T. (2001). "The root of all evil"? An exploratory study of money and delinquent involvement. *Justice Quarterly*, 18(2), 239-268.**

## 2002

52. **Agnew, R. (2002). Experienced, vicarious, and anticipated strain: An exploratory study on physical victimization and delinquency. *Justice Quarterly*, 19(4), 603-632.**
53. Agnew, R., Brezina, T., Wright, J. P., & Cullen, F. T. (2002). Strain, personality traits, and delinquency: Extending general strain theory. *Criminology*, 40(1), 43-72.
54. Butters, J. E. (2002). Family stressors and adolescent cannabis use: a pathway to problem use. *Journal of Adolescence*, 25(6), 645-654.
55. Eitle, D. J. (2002). Exploring a source of deviance-producing strain for females: Perceived discrimination and general strain theory. *Journal of Criminal Justice*, 30(5), 429-442.
56. Eitle, D., & Turner, R. J. (2002). Exposure to community violence and young adult crime: The effects of witnessing violence, traumatic victimization, and other stressful life events. *Journal of Research in Crime and Delinquency*, 39(2), 214-237.
57. Kim, J. M. (2002). *An application of general strain theory to Korean adolescents* (Doctoral dissertation, Michigan State University).
58. Newcomb, M. D., Abbott, R. D., Catalano, R. F., Hawkins, J. D., Battin-Pearson, S., & Hill, K. (2002). Mediation and deviance theories of late high school failure: Process roles of structural strains, academic competence, and general versus specific problem behavior. *Journal of Counseling Psychology*, 49(2), 172-186.

## 2003

59. Bichler-Robertson, G., Potchak, M. C., & Tibbetts, S. (2003). Low self-control, opportunity, and strain in students' reported cheating behavior. *Journal of Crime and Justice*, 26(1), 23-53.

60. Chen, X. (2003). *Life stressors, anger and internalization, and substance use among American Indian adolescents in the Midwest: An empirical test of general strain theory* (Doctoral dissertation, Iowa State University).
61. Eitle, D., & Turner, R. J. (2003). Stress exposure, race, and young adult male crime. *The Sociological Quarterly*, 44(2), 243-269.
62. Hay, C. (2003). Family strain, gender, and delinquency. *Sociological Perspectives*, 46(1), 107-135.
63. Hoffmann, J. P. (2003). A contextual analysis of differential association, social control, and strain theories of delinquency. *Social Forces*, 81(3), 753-785.
64. Hollist, D. R. (2003). *Maltreatment, family conflict, and gender: A family based test of general strain theory* (Doctoral dissertation, Washington State University).
65. Jang, S. J., & Johnson, B. R. (2003). Strain, negative emotions, and deviant coping among African Americans: A test of general strain theory. *Journal of Quantitative Criminology*, 19(1), 79-105.
66. Maschi, T. M. (2003). *The cumulative and differential effects of trauma on male delinquency: A test of general strain theory* (Doctoral dissertation, Rutgers University).
67. Mazerolle, P., Piquero, A. R., & Capowich, G. E. (2003). Examining the links between strain, types of anger, and crime: An assessment of General Strain Theory. *Youth and Society*, 35(2), 131-157.
68. Peter, T., Lagrange, T., & Silverman, R. (2003). Investigating the interdependence of strain and self-control. *Canadian Journal of Criminology and Criminal Justice*, 45(4), 431-464.
69. Simons, R. L., Chen, Y. F., Stewart, E. A., & Brody, G. H. (2003). Incidents of discrimination and risk for delinquency: A longitudinal test of strain theory with an African American sample. *Justice Quarterly*, 20(4), 827-854.
70. Warner, B. D., & Fowler, S. K. (2003). Strain and violence: Testing a general strain theory model of community violence. *Journal of Criminal Justice*, 31(6), 511-521.

## 2004

71. Bao, W. N., Haas, A., & Pi, Y. (2004). Life strain, negative emotions, and delinquency: An empirical test of general strain theory in the People's Republic of China. *International Journal of Offender Therapy and Comparative Criminology*, 48(3), 281-297.
72. Baron, S. W. (2004). General strain, street youth and crime: A test of Agnew's revised theory. *Criminology*, 42(2), 457-484.

73. Byongook, M., & Morash, M. (2004). Adaptation of theory for alternative cultural contexts: Agnew's general strain theory in South Korea. *International Journal of Comparative and Applied Criminal Justice*, 28(2), 77-104.
74. Carmichael, S., & Piquero, A. R. (2004). Sanctions, perceived anger, and criminal offending. *Journal of Quantitative Criminology*, 20(4), 371-393.
75. Colbert, S. S. (2004). *Applying general strain theory to juvenile sex offenders* (Doctoral dissertation, University of Oklahoma).
76. Curry, K. M. (2004). *General strain theory: An analysis of adult female criminality and self-destructive behavior* (Doctoral dissertation, University of Delaware).
77. Dean, N. S. (2004). *The empirical status of general strain theory: Racial differences in response to strain* (Doctoral dissertation, University of Oklahoma).
78. Eitle, D., Gunkel, S., & Van Gundy, K. (2004). Cumulative exposure to stressful life events and male gang membership. *Journal of Criminal Justice*, 32(2), 95-111.
79. Hoffmann, J. P., & Ireland, T. O. (2004). Strain and opportunity structures. *Journal of Quantitative Criminology*, 20(3), 263-292.
80. Kennedy, D. B., Homant, R. J., & Homant, M. R. (2004). Perception of injustice as a predictor of support for workplace aggression. *Journal of Business and Psychology*, 18(3), 323-336.
81. Piquero, N. L., & Sealock, M. D. (2004). Gender and general strain theory: A preliminary test of Broidy and Agnew's gender/GST hypotheses. *Justice Quarterly*, 21(1), 125-158.
82. Robbers, M. L. (2004). Revisiting the moderating effect of social support on strain: A gendered test. *Sociological Inquiry*, 74(4), 546-569.
83. **Thaxton, S., & Agnew, R. (2004). The nonlinear effects of parental and teacher attachment on delinquency: Disentangling strain from social control explanations. *Justice Quarterly*, 21(4), 763-791.**

## 2005

84. Harrell, E. A. (2005). *The application of Agnew's general strain theory to the relationship between adolescent victimization and delinquent behavior* (Doctoral dissertation, University of Delaware).
85. Kaufman, J. M. (2005). Explaining the race/ethnicity-violence relationship: Neighborhood context and social psychological processes. *Justice Quarterly*, 22(2), 224-251.

86. Keesee, M. S. (2005). *Assessing the effects of strain on HIV risk-behavior and adherence to treatment regimes: An empirical test of general strain theory* (Doctoral dissertation, University of Oklahoma).
87. Jang, S. J., & Johnson, B. R. (2005). Gender, religiosity, and reactions to strain among African Americans. *The Sociological Quarterly*, 46(2), 323-357.
88. Ngai, S. S. Y., & Cheung, C. K. (2005). When does career strain reduce delinquency? Friendship concern in Hong Kong. *International Journal of Adolescence and Youth*, 12(1-2), 131-147.
89. Ostrowsky, M. K., & Messner, S. F. (2005). Explaining crime for a young adult population: An application of general strain theory. *Journal of Criminal Justice*, 33(5), 463-476.
90. Sharp, S. F., Brewster, D., & Love, S. R. (2005). Disentangling strain, personal attributes, affective response and deviance: A gendered analysis. *Deviant Behavior*, 26(2), 133-157.
91. Slocum, L. A., Simpson, S. S., & Smith, D. A. (2005). Strained lives and crime: Examining intra-individual variation in strain and offending in a sample of incarcerated women. *Criminology*, 43(4), 1067-1110.
92. Wallace, L. H., Patchin, J. W., & May, J. D. (2005). Reactions of victimized youth: Strain as an explanation of school delinquency. *Western Criminology Review*, 6(1), 104-116.
93. Wareham, J., Cochran, J. K., Dembo, R., & Sellers, C. S. (2005). Community, strain, and delinquency: A test of a multi-level model of general strain theory. *Western Criminology Review*, 6(1), 117-133.

## **2006**

94. Baron, S. W. (2006). Street youth, strain theory, and crime. *Journal of Criminal Justice*, 34(2), 209-223.
95. Cheong, K., & Kwon, R. (2006). The relationships between parental and teacher attachment and juvenile delinquency: An empirical test of general strain theory. *Korean Journal of Youth Studies* 13(5-2), 81-102.
96. De Coster, S., & Kort-Butler, L. (2006). How general is general strain theory? Assessing determinacy and indeterminacy across life domains. *Journal of Research in Crime and Delinquency*, 43(4), 297-325.
97. Drapela, L. A. (2006). The effect of negative emotion on licit and illicit drug use among high school dropouts: An empirical test of general strain theory. *Journal of Youth and Adolescence*, 35(5), 752-767.



98. Gullion, J. G. (2006). *Explaining juvenile delinquency: A test of Robert Agnew's general strain theory utilizing the National Longitudinal Study of Adolescent Health data* (Doctoral dissertation, University of North Texas).
99. Hay, C., & Evans, M. M. (2006). Violent victimization and involvement in delinquency: Examining predictions from general strain theory. *Journal of Criminal Justice, 34*(3), 261-274.
100. Hefley, K. S. (2006). *Combining general strain theory with feminist theories to explain rape* (Doctoral dissertation, University of Oklahoma).
101. Jang, S. J., & Lyons, J. A. (2006). Strain, social support, and retreatism among African Americans. *Journal of Black Studies, 37*(2), 251-274.
102. Manzoni, P., & Eisner, M. (2006). Violence between the police and the public: Influences of work-related stress, job satisfaction, burnout, and situational factors. *Criminal Justice and Behavior, 33*(5), 613-645.
103. Maschi, T. (2006). Unraveling the link between trauma and male delinquency: The cumulative versus differential risk perspectives. *Social Work, 51*(1), 59-70.
104. Morgan, N. W. (2006). *The role of negative emotions in general strain theory* (Doctoral dissertation, Emory University).
105. Preston, P. (2006). Marijuana use as a coping response to psychological strain: Racial, ethnic, and gender differences among young adults. *Deviant Behavior, 27*(4), 397-421.
106. **Rice, S. K. (2006). General strain amid restoration: An examination of instrumental and expressive offenses (Doctoral dissertation, University of Florida).**
107. Simons, R. L., Simons, L. G., Burt, C. H., Drummund, H., Stewart, E., Brody, G. H., Gibbons, F. S., & Cutrona, C. (2006). Supportive parenting moderates the effect of discrimination upon anger, hostile view of relationships, and violence among African American boys. *Journal of Health and Social Behavior, 47*(4), 373-389.
- 2007**
108. Arter, M. L. (2007). Stress and deviance in policing. *Deviant Behavior, 29*(1), 43-69.
109. Bao, W. N., Haas, A., & Pi, Y. (2007). Life strain, coping, and delinquency in the People's Republic of China: An empirical test of general strain theory from a matching perspective in social support. *International Journal of Offender Therapy and Comparative Criminology, 51*(1), 9-24.
110. Baron, S. W. (2007). Street youth, gender, financial strain, and crime: Exploring Broidy and Agnew's extension to general strain theory. *Deviant Behavior, 28*(3), 273-302.

111. Cheung, C. K., Ngai, N. P., & Ngai, S. S. Y. (2007). Family strain and adolescent delinquency in two Chinese cities, Guangzhou and Hong Kong. *Journal of Child and Family Studies*, 16(5), 626-641.
112. Cuevas, C. A., Finkelhor, D., Turner, H. A., & Ormrod, R. K. (2007). Juvenile delinquency and victimization: A theoretical typology. *Journal of Interpersonal Violence*, 22(12), 1581-1602.
113. Ellwanger, S. J. (2007). Strain, attribution, and traffic delinquency among young drivers: Measuring and testing general strain theory in the context of driving. *Crime & Delinquency*, 53(4), 523-551.
114. Francis, K. A. (2007). *Gender differences in delinquency and health risk behaviors: A test of general strain theory* (Doctoral dissertation, University of Texas at Austin).
115. Froggio, G., & Agnew, R. (2007). The relationship between crime and “objective” versus “subjective” strains. *Journal of Criminal Justice*, 35(1), 81-87.
116. Hinduja, S. (2007). Work place violence and negative affective responses: A test of Agnew’s general strain theory. *Journal of Criminal Justice*, 35(6), 657-666.
117. Hinduja, S., & Patchin, J. W. (2007). Offline consequences of online victimization: School violence and delinquency. *Journal of School Violence*, 6(3), 89-112.
118. Jang, S. J. (2007). Gender differences in strain, negative emotions, and coping behaviors: A general strain theory approach. *Justice Quarterly*, 24(3), 523-553.
119. Johnson, M. C., & Kercher, G. A. (2007). ADHD, strain, and criminal behavior: a test of general strain theory. *Deviant Behavior*, 28(2), 131-152.
120. Langton, L., & Piquero, N. L. (2007). Can general strain theory explain white-collar crime? A preliminary investigation of the relationship between strain and select white-collar offenses. *Journal of Criminal Justice*, 35(1), 1-15.
121. Liu, R. X., & Lin, W. (2007). Delinquency among Chinese adolescents: Modeling sources of frustration and gender differences. *Deviant Behavior*, 28(5), 409-432.
122. Morash, M., & Moon, B. (2007). Gender differences in the effects of strain on the delinquency of South Korean youth. *Youth & Society*, 38(3), 300-321.
123. Neff, J. L., & Waite, D. E. (2007). Male versus female substance abuse patterns among incarcerated juvenile offenders: Comparing strain and social learning variables. *Justice Quarterly*, 24(1), 106-132.

124. Rios, S. J. (2007). *Examining possible interaction effects between self-control theory and general strain theory* (Doctoral dissertation, University of Oklahoma).
125. Slocum, L. A. (2007). *General strain theory and stability of offending and substance use over time: A dynamic approach* (Doctoral dissertation, University of Maryland).
126. Swatt, M. L., Gibson, C. L., & Piquero, N. L. (2007). Exploring the utility of general strain theory in explaining problematic alcohol consumption by police officers. *Journal of Criminal Justice*, 35(6), 596-611.
127. Walls, M. L., Chapple, C. L., & Johnson, K. D. (2007). Strain, emotion, and suicide among American Indian youth. *Deviant Behavior*, 28(3), 219-246.

## 2008

128. **Agnew, R., Matthews, S. K., Bucher, J., Welcher, A. N., & Keyes, C. (2008). Socioeconomic status, economic problems, and delinquency. *Youth & Society*, 40(2), 159-181.**
129. Baron, S. W. (2008). Street youth, unemployment, and crime: Is it that simple? Using general strain theory to untangle the relationship. *Canadian Journal of Criminology and Criminal Justice*, 50(4), 399-434.
130. Carson, D. C., Sullivan, C. J., Cochran, J. K., & Lersch, K. M. (2008). General strain theory and the relationship between early victimization and drug use. *Deviant Behavior*, 30(1), 54-88.
131. Cheung, N. W., & Cheung, Y. W. (2008). Self-control, social factors, and delinquency: A test of the general theory of crime among adolescents in Hong Kong. *Journal of Youth and Adolescence*, 37(4), 412-430.
132. Cullen, F. T., Unnever, J. D., Hartman, J. L., Turner, M. G., & Agnew, R. (2008). Gender, bullying victimization, and juvenile delinquency: A test of general strain theory. *Victims and Offenders*, 3(4), 346-364.
133. Ford, J. A., & Schroeder, R. D. (2008). Academic strain and non-medical use of prescription stimulants among college students. *Deviant Behavior*, 30(1), 26-53.
134. Johnson, M. C., & Morris, R. G. (2008). The moderating effects of religiosity on the relationship between stressful life events and delinquent behavior. *Journal of Criminal Justice*, 36(6), 486-493.
135. Kaufman, J. M., Rebellon, C. J., Thaxton, S., & Agnew, R. (2008). A general strain theory of racial differences in criminal offending. *Australian & New Zealand Journal of Criminology*, 41(3), 421-437.

136. Kim, J.M., & Chang-Hun, L. (2008). *An application of general strain theory to Korean adolescents*. VDM Verlag.
137. Lee, D. R., & Cohen, J. W. (2008). Examining strain in a school context. *Youth Violence and Juvenile Justice*, 6(2), 115-135.
138. Maschi, T., Bradley, C. A., & Morgen, K. (2008). Unraveling the link between trauma and delinquency: The mediating role of negative affect and delinquent peer exposure. *Youth Violence and Juvenile Justice*, 6(2), 136-157.
139. Moon, B., Blurton, D., & McCluskey, J. D. (2008). General strain theory and delinquency: Focusing on the influences of key strain characteristics on delinquency. *Crime & Delinquency*, 54(4), 582-613.
140. Mooney, J. L., Minor, K. I., Wells, J. B., Leukefeld, C., Oser, C. B., & Staton Tindall, M. (2008). The relationship of stress, impulsivity, and beliefs to drug use severity in a sample of women prison inmates. *International Journal of Offender Therapy and Comparative Criminology*, 52(6), 686-697.
141. Pérez, D. M., Jennings, W. G., & Gover, A. R. (2008). Specifying general strain theory: An ethnically relevant approach. *Deviant Behavior*, 29(6), 544-578.
142. Rocque, M. (2008). Strain, coping mechanisms, and slavery: a general strain theory application. *Crime, Law and Social Change*, 49(4), 245-269.
143. Savage, J. (2008). The role of exposure to media violence in the etiology of violent behavior. *American Behavioral Scientist*, 51(8), 1123-1136.
144. Sigfusdottir, I. D., Asgeirsdottir, B. B., Gudjonsson, G. H., & Sigurdsson, J. F. (2008). A model of sexual abuse's effects on suicidal behavior and delinquency: The role of emotions as mediating factors. *Journal of Youth and Adolescence*, 37(6), 699-712.
145. Tittle, C. R., Broidy, L. M., & Gertz, M. G. (2008). Strain, crime, and contingencies. *Justice Quarterly*, 25(2), 283-312.
146. Williams, D. (2008). *Gender and general strain theory in a sample of college students* (Doctoral dissertation, University of Oklahoma).

## **2009**

147. Ackerman, A. R. (2009). *Registered sex offenders in the community: A test of Agnew's general strain theory* (Doctoral dissertation, City University of New York).

148. Asselin, N. R. P. (2009). *Using general strain theory to understand drug and alcohol use in Canada: An examination of how strain, its conditioning variables and gender are interrelated* (Doctoral dissertation, Queen's University).
149. Bao, W. N., & Haas, A. (2009). Social change, life strain, and delinquency among Chinese urban adolescents. *Sociological Focus*, 42(3), 285-305.
150. Baron, S. W. (2009). Street youths' violent responses to violent personal, vicarious, and anticipated strain. *Journal of Criminal Justice*, 37(5), 442-451.
151. Botchkovar, E. V., Tittle, C. R., & Antonaccio, O. (2009). General strain theory: Additional evidence using cross- cultural data. *Criminology*, 47(1), 131-176.
152. De Clercq, D., & Dakhli, M. (2009). Personal strain and ethical standards of the self-employed. *Journal of Business Venturing*, 24(5), 477-490.
153. Burt, C. H. (2009). *Discrimination and deviance* (Doctoral dissertation, University of Georgia).
154. Ellis, S., & Savage, J. (2009). Strain, social support, and persistent criminality. In J. Savage (ed.), *The development of persistent criminality* (pp.71-89). New York: Oxford University Press.
155. Froggio, G., Zamaro, N., & Lori, M. (2009). Exploring the relationship between strain and some neutralization techniques. *European Journal of Criminology*, 6(1), 73-88.
156. Gallupe, O., & Baron, S. W. (2009). Street youth, relational strain, and drug use. *Journal of Drug Issues*, 39(3), 523-545.
157. Greco, R., Curci, A., & Grattagliano, I. (2009). Juvenile criminality: general strain theory and the reactive-proactive aggression trait. *Rivista di Psichiatria*, 44(5), 328-336.
158. Hinduja, S. (2009). Occupational stressors and antinormative behavior. *Security Journal*, 22(4), 269-285.
159. Hollist, D. R., Hughes, L. A., & Schaible, L. M. (2009). Adolescent maltreatment, negative emotion, and delinquency: An assessment of general strain theory and family-based strain. *Journal of criminal justice*, 37(4), 379-387.
160. Ireland, T. O., Rivera, C. J., & Hoffmann, J. P. (2009). Developmental trajectories, stressful life events, and delinquency. In J. Savage (ed.), *The development of persistent criminality* (pp.90-114). New York: Oxford University Press.
161. Jennings, W. G., Piquero, N. L., Gover, A. R., & Perez, D. M. (2009). Gender and general strain theory: A replication and exploration of Broidy and Agnew's gender/strain hypothesis among a

- sample of southwestern Mexican American adolescents. *Journal of Criminal Justice*, 37(4), 404-417.
162. Kaufman, J. M. (2009). Gendered responses to serious strain: The argument for a general strain theory of deviance. *Justice Quarterly*, 26(3), 410-444.
  163. Matthews, S. K. (2009). *Self-complexity and crime: Extending general strain theory* (Doctoral dissertation, Emory University).
  164. Meneses, R. A. (2009). *A cross-cultural test of social learning, self-control, social bonding and general strain theories of crime and deviance* (Doctoral dissertation, University of Florida).
  165. Moon, B., Hays, K., & Blurton, D. (2009). General strain theory, key strains, and deviance. *Journal of Criminal Justice*, 37(1), 98-106.
  166. Moon, B., Morash, M., McCluskey, C. P., & Hwang, H. W. (2009). A comprehensive test of general strain theory: Key strains, situational-and trait-based negative emotions, conditioning factors, and delinquency. *Journal of Research in Crime and Delinquency*, 46(2), 182-212.
  167. Rebellon, C. J., Leeper Piquero, N., Piquero, A. R., & Thaxton, S. (2009). Do frustrated economic expectations and objective economic inequity promote crime? A randomized experiment testing Agnew's general strain theory. *European Journal of Criminology*, 6(1), 47-71.
  168. Sigfusdottir, I. D., & Silver, E. (2009). Emotional reactions to stress among adolescent boys and girls: An examination of the mediating mechanisms proposed by general strain theory. *Youth & Society*, 40(4), 571-590.
  169. Smith-Kea, N. D. (2009). *Strain experienced in prison and its impact on perception of the prison environment and the rate of recidivism* (Doctoral dissertation, University of Maryland).
  170. Tsunokai, G. T., & Kposowa, A. J. (2009). Explaining gang involvement and delinquency among Asian Americans: An empirical test of general strain theory. *Journal of Gang Research*, 6(3), 1-33.

## **2010**

171. Akins, S., Smith, C. L., & Mosher, C. (2010). Pathways to adult alcohol abuse across racial/ethnic groups: An application of general strain and social learning theories. *Journal of Drug Issues*, 40(2), 321-351.
172. Baker, C. K., Hishinuma, E. S., Chang, J. Y., & Nixon, D. C. (2010). The relationship among exposure to stressful life events, drug use, and violence perpetration in a sample of native Hawaiian, Samoan, and Filipino adolescents. *Journal of Interpersonal Violence*, 25(3), 379-399.

173. Bergeron, L. E. (2010). *Female criminality and community reentry: An examination of general strain theory* (Doctoral dissertation, North Dakota State University).
174. Blevins, K. R., Johnson Listwan, S., Cullen, F. T., & Lero Jonson, C. (2010). A general strain theory of prison violence and misconduct: An integrated model of inmate behavior. *Journal of Contemporary Criminal Justice*, 26(2), 148-166.
175. Botchkovar, E. V., & Hughes, L. A. (2010). Strain and alcohol use in Russia: A gendered analysis. *Sociological Perspectives*, 53(3), 297-319.
176. Brezina, T. (2010). Anger, attitudes, and aggressive behavior: Exploring the affective and cognitive foundations of angry aggression. *Journal of Contemporary Criminal Justice*, 26(2), 186-203.
177. Cheung, N. W. T., & Cheung, Y. W. (2010). Strain, self-control, and gender differences in delinquency among Chinese adolescents: Extending general strain theory. *Sociological Perspectives*, 53(3), 321-345.
178. De Coster, S., & Cornell Zito, R. (2010). Gender and general strain theory: The gendering of emotional experiences and expressions. *Journal of Contemporary Criminal Justice*, 26(2), 224-245.
179. Eitle, D. (2010). General strain theory, persistence, and desistance among young adult males. *Journal of Criminal Justice*, 38(6), 1113-1121.
180. Eitle, D., & Taylor, J. (2010). General strain theory, BIS/BAS levels, and gambling behavior. *Deviant Behavior*, 32(1), 1-37.
181. Ganem, N. M. (2010). The role of negative emotion in general strain theory. *Journal of Contemporary Criminal Justice*, 26(2), 167-185.
182. Hay, C., & Meldrum, R. (2010). Bullying victimization and adolescent self-harm: Testing hypotheses from general strain theory. *Journal of Youth and Adolescence*, 39(5), 446-459.
183. Hay, C., Meldrum, R., & Mann, K. (2010). Traditional bullying, cyber bullying, and deviance: A general strain theory approach. *Journal of Contemporary Criminal Justice*, 26(2), 130-147.
184. Hoffmann, J. P. (2010). A life-course perspective on stress, delinquency, and young adult crime. *American Journal of Criminal Justice*, 35(3), 105-120.
185. Kam, J. A., Cleveland, M. J., & Hecht, M. L. (2010). Applying general strain theory to examine perceived discrimination's indirect relation to Mexican-heritage youth's alcohol, cigarette, and marijuana use. *Prevention Science*, 11(4), 397-410.

186. Leeper Piquero, N., & Sealock, M. D. (2010). Race, crime, and general strain theory. *Youth Violence and Juvenile Justice*, 8(3), 170-186.
187. Purser, C. W. (2010). *The conditioning effects of religiosity on the relationship between strain, negative emotions, and delinquency: A longitudinal assessment of general strain theory* (Doctoral dissertation, Mississippi State University).
188. Robertson, A. R., Stein, J. A., & Schaefer-Rohleder, L. (2010). Effects of hurricane Katrina and other adverse life events on adolescent female offenders: A test of general strain theory. *Journal of Research in Crime and Delinquency*, 47(4), 469-495.
189. Rodriguez, J. J., & Belshaw, S. (2010). General strain theory: A comparative analysis of Latino & White youths. *Southwest Journal of Criminal Justice*, 7(2), 138-158.
190. Slocum, L. A. (2010). General strain theory and continuity in offending over time: Assessing and extending GST explanations of persistence. *Journal of Contemporary Criminal Justice*, 26(2), 204-223.
191. Slocum, L. A. (2010). General strain theory and the development of stressors and substance use over time: An empirical examination. *Journal of Criminal Justice*, 38(6), 1100-1112.

## **2011**

192. Bucher, J. (2011). General issue (GI) strain: Applying strain theory to military offending. *Deviant Behavior*, 32(9), 846-875.
193. Cheong, J., & Yun, I. (2011). Victimization, stress and use of force among South Korean police officers. *Policing: An International Journal of Police Strategies & Management*, 34(4), 606-624.
194. Descormiers, K., Bouchard, M., & Ray, C. (2011). Strain, social capital, and access to lucrative crime opportunities. *International Journal of Child, Youth & Family Studies*, 2(1/2), 83.
195. Gächter, M., Savage, D. A., & Torgler, B. (2011). The relationship between stress, strain and social capital. *Policing: An International Journal of Police Strategies & Management*, 34(3), 515-540.
196. Higgins, G. E., Piquero, N. L., & Piquero, A. R. (2011). General strain theory, peer rejection, and delinquency/crime. *Youth & Society*, 43(4), 1272-1297.
197. Hoskin, A. (2011). Explaining the link between race and violence with general strain theory. *Journal of Ethnicity in Criminal Justice*, 9(1), 56-73.
198. Lin, W. H. (2011). *General strain theory and juvenile delinquency: a cross-cultural study* (Doctoral dissertation, University of South Florida).



199. Lin, W. H., Cochran, J. K., & Mieczkowski, T. (2011). Direct and vicarious violent victimization and juvenile delinquency: An application of general strain theory. *Sociological Inquiry*, 81(2), 195-222.
200. Lin, W. H., & Mieczkowski, T. (2011). Subjective strains, conditioning factors, and juvenile delinquency: General strain theory in Taiwan. *Asian Journal of Criminology*, 6(1), 69-87.
201. Liu, R. X. (2011). Strain as a moderator of the relationship between parental attachment and delinquent participation: A China study. *International Criminal Justice Review*, 21(4), 427-442.
202. Martin, M. J., McCarthy, B., Conger, R. D., Gibbons, F. X., Simons, R. L., Cutrona, C. E., & Brody, G. H. (2011). The enduring significance of racism: Discrimination and delinquency among Black American youth. *Journal of Research on Adolescence*, 21(3), 662-676.
203. Matthews, S. K. (2011). Self-complexity and crime: Extending general strain theory. *Justice Quarterly*, 28(6), 863-902.
204. Meneses, R. A., & Akers, R. L. (2011). A comparison of four general theories of crime and deviance: Marijuana use among American and Bolivian university students. *International Criminal Justice Review*, 21(4), 333-352.
205. Moon, B., Hwang, H. W., & McCluskey, J. D. (2011). Causes of school bullying: Empirical test of a general theory of crime, differential association theory, and general strain theory. *Crime & Delinquency*, 57(6), 849-877.
206. Nam, S. I., Choi, K. H., & Min, J. A. (2011). Gender differences of adolescent suicidality: Focused on the general strain theory. *Korean Journal of Social Welfare Studies* 27, 35-64.
207. **Ngo, F. T., Paternoster, R., Cullen, F. T., & Mackenzie, D. L. (2011). Life domains and crime: A test of Agnew's general theory of crime and delinquency. *Journal of Criminal Justice*, 39(4), 302-311.**
208. Özbay, Ö. (2011). Does general strain theory account for youth deviance in Turkey? *Nevşehir Hacı Bektaş Veli Üniversitesi SBE Dergisi*, 1(1).
209. Paat, Y. F. (2011). The link between financial strain, interparental discord and children's antisocial behaviors. *Journal of Family Violence*, 26(3), 195-210.
210. Patchin, J. W., & Hinduja, S. (2011). Traditional and nontraditional bullying among youth: A test of general strain theory. *Youth & Society*, 43(2), 727-751.
211. Peck, J. H. (2011). *General strain theory, race, and delinquency* (Doctoral dissertation, University of South Florida).

212. Rivera, F., López, I., Guarnaccia, P., Ramirez, R., Canino, G., & Bird, H. (2011). Perceived discrimination and antisocial behaviors in Puerto Rican children. *Journal of Immigrant and Minority Health, 13*(3), 453-461.
213. Sander, J. B., Sharkey, J. D., Fisher, A. L., Bates, S., & Herren, J. A. (2011). School policies, academic achievement, and general strain theory: Applications to juvenile justice settings. *OJJDP Journal of Juvenile Justice, 1*(1), 107-120.
214. Savage, J. M. (2011). *Gendered pathways from strain to delinquency during adolescence: an integration of general strain theory and differential gender socialization* (Doctoral dissertation, Northeastern University).
215. Schroeder, R. D., Hill, T. D., Haynes, S. H., & Bradley, C. (2011). Physical health and crime among low-income urban women: An application of general strain theory. *Journal of Criminal Justice, 39*(1), 21-29.
216. Sexton, C. W. (2011). *The impact of strain on hate crime: Testing Agnew's macro-level general strain theory* (Doctoral dissertation, State University of New York at Buffalo).
217. Song, A. Y., Lim, H. J., & Wang, J. H. (2011). A study of victimization from school violence, adolescents' internet addiction based on general strain theory. *Korean Journal of Social Welfare Research, 27*, 65-82.
218. Spohn, R. E., & Kurtz, D. L. (2011). Family structure as a social context for family conflict: Unjust strain and serious delinquency. *Criminal justice review, 36*(3), 332-356.
219. Stackman, V. R. (2011). *Testing general strain theory on female inmates: A comparison of two measures of negative emotion* (Doctoral dissertation, Howard University).
220. Steele, J. L. (2011). *Adolescent substance use and general social strain theory: The influence of race/ethnic-related strains and protective factors* (Doctoral dissertation, University of Akron).
221. Stogner, J. M. (2011). *A biosocially informed investigation of general strain theory* (Doctoral dissertation, University of Florida).
222. Stogner, J., & Gibson, C. L. (2011). The influence of health strain on the initiation and frequency of substance use in a national sample of adolescents. *Journal of Drug Issues, 41*(1), 69-93.
223. Vegh, D. T. (2011). *College students and the illicit use of prescription drugs: a test of general strain theory* (Doctoral dissertation, Northeastern University).
224. Zhang, Z. (2011). *The effects of depression and anger on bullying: An extension of general strain theory* (Doctoral dissertation, University of Texas at San Antonio).

## 2012

225. Ackerman, A. R., & Sacks, M. (2012). Can general strain theory be used to explain recidivism among registered sex offenders? *Journal of Criminal Justice*, 40(3), 187-193.
226. Ansell, E. B., Gu, P., Tuit, K., & Sinha, R. (2012). Effects of cumulative stress and impulsivity on smoking status. *Human Psychopharmacology: Clinical and Experimental*, 27(2), 200-208.
227. Barn, R., & Tan, J. P. (2012). Foster youth and crime: Employing general strain theory to promote understanding. *Journal of Criminal Justice*, 40(3), 212-220.
228. de Beeck, H. O., Pauwels, L. J., & Put, J. (2012). Schools, strain and offending: Testing a school contextual version of general strain theory. *European Journal of Criminology*, 9(1), 52-72.
229. **Estrada-Martínez, L. M., Caldwell, C. H., Bauermeister, J. A., & Zimmerman, M. A. (2012). Stressors in multiple life-domains and the risk for externalizing and internalizing behaviors among African Americans during emerging adulthood. *Journal of Youth and Adolescence*, 41(12), 1600-1612.**
230. Felson, R. B., Osgood, D. W., Horney, J., & Wiernik, C. (2012). Having a bad month: General versus specific effects of stress on crime. *Journal of Quantitative Criminology*, 28(2), 347-363.
231. Garcia, C. A., & Lane, J. (2012). Dealing with the fall-out: Identifying and addressing the role that relationship strain plays in the lives of girls in the juvenile justice system. *Journal of Criminal Justice*, 40(3), 259-267.
232. Hetterle, L. R. (2012). *Examining sociobiological fitness traits in conjunction with the general strain theory in convicted rapists* (Doctoral dissertation, Regis University).
233. Hinduja, S. (2012). General strain, self-control, and music piracy. *International Journal of Cyber Criminology*, 6(1), 951-967.
234. Horton, R., Rice, S. K., Piquero, N. L., & Piquero, A. R. (2012). On the variability of anger cross-culturally: An assessment of general strain theory's primary mediator. *Deviant Behavior*, 33(4), 260-281.
235. Huck, J. L., Lee, D. R., Bowen, K. N., & Spraitz, J. D. (2012). Specifying the dynamic relationships of general strain, coping and young adult crime. *Western Criminology Review*, 13(2), 36-45.
236. Jackson, D. B. (2012). The role of early pubertal development in the relationship between general strain and juvenile crime. *Youth Violence and Juvenile Justice*, 10(3), 292-310.

237. Jackson, T. K. (2012). Pressured into deception: Using general strain theory as a framework for testing the validity of self-reported drug use of respondents in jail. *Journal of Drug Issues*, 42(4), 373-395.
238. Jang, S. J., & Rhodes, J. R. (2012). General strain and non-strain theories: A study of crime in emerging adulthood. *Journal of Criminal Justice*, 40(3), 176-186.
239. Jonson, C. L., McArthur, R., Cullen, F. T., & Wilcox, P. (2012). Unravelling the sources of adolescent substance use: A test of rival theories. *International Journal on School Disaffection*, 9(2), 53-90.
240. Lin, W. H. (2012). General strain theory in Taiwan: A latent growth curve modeling approach. *Asian Journal of Criminology*, 7(1), 37-54.
241. Liu, R. X. (2012). The effects of strain and centrality of strain on delinquency among Chinese adolescents. *Sociological Inquiry*, 82(4), 578-600.
242. Mason, B., & Smithey, M. (2012). The effects of academic and interpersonal stress on dating violence among college students. *Journal of Interpersonal Violence*, 27(5), 974-986.
243. McGrath, S. A., Marcum, C. D., & Copes, H. (2012). The effects of experienced, vicarious, and anticipated strain on violence and drug use among inmates. *American Journal of Criminal Justice*, 37(1), 60-75.
244. Moon, B., Morash, M., & McCluskey, J. D. (2012). General strain theory and school bullying: An empirical test in South Korea. *Crime & Delinquency*, 58(6), 827-855.
245. Moon, M. M., & Jonson, C. L. (2012). The influence of occupational strain on organizational commitment among police: A general strain theory approach. *Journal of Criminal Justice*, 40(3), 249-258.
246. Morris, R. G., Carriaga, M. L., Diamond, B., Piquero, N. L., & Piquero, A. R. (2012). Does prison strain lead to prison misbehavior? An application of general strain theory to inmate misconduct. *Journal of Criminal Justice*, 40(3), 194-201.
247. Newman, J. E. (2012). *Are the effects of poverty and victimization on criminal recidivism mediated by depression as predicted by general strain theory?* (Doctoral dissertation, Ryerson University).
248. Özbay, Ö. (2012). Gender, cumulative strain and deviant behavior in Turkey. *Nevşehir Hacı Bektaş Veli Üniversitesi SBE Dergisi*, 2(1).
249. Purwandari, E. (2012). Keluarga, kontrol sosial, dan "strain": model delinquency remaja. *Humanitas: Indonesian Psychological Journal*, 8(1), 28-44.

250. Rebellon, C. J., Manasse, M. E., Van Gundy, K. T., & Cohn, E. S. (2012). Perceived injustice and delinquency: A test of general strain theory. *Journal of Criminal Justice, 40*(3), 230-237.
251. Schroeder, R. D., & Ford, J. A. (2012). Prescription drug misuse: A test of three competing criminological theories. *Journal of Drug Issues, 42*(1), 4-27.
252. Sealock, M. D., & Manasse, M. (2012). An uneven playing field: The impact of strain and coping skills on treatment outcomes for juvenile offenders. *Journal of Criminal Justice, 40*(3), 238-248.
253. Sharp, S. F., Peck, B. M., & Hartsfield, J. (2012). Childhood adversity and substance use of women prisoners: A general strain theory approach. *Journal of Criminal Justice, 40*(3), 202-211.
254. Sigfusdottir, I. D., Kristjansson, A. L., & Agnew, R. (2012). A comparative analysis of general strain theory. *Journal of Criminal Justice, 40*(2), 117-127.
255. Slocum, L. A., Rengifo, A. F., & Carbone-Lopez, K. (2012). Specifying the strain-violence link: The role of emotions in women's descriptions of violent incidents. *Victims & Offenders, 7*(1), 1-29.
256. Spohn, R. E. (2012). Delinquent friends and reactions to strain: An examination of direct and indirect pathways. *Western Criminology Review, 13*(1), 16-36.
257. Zhang, Y., Day, G., & Cao, L. (2012). A partial test of Agnew's general theory of crime and delinquency. *Crime & Delinquency, 58*(6), 856-878.

## 2013

258. Bishopp, S. A. (2013). *An examination of general strain theory and the effects of violent crime exposure on police suicide ideation, alcohol consumption, and divorce* (Doctoral dissertation, University of Texas at Dallas).
259. Botchkovar, E., & Broidy, L. (2013). Accumulated strain, negative emotions, and crime: A test of general strain theory in Russia. *Crime & Delinquency, 59*(6), 837-860.
260. Botchkovar, E. V., Tittle, C. R., & Antonaccio, O. (2013). Strain, coping, and socioeconomic status: Coping histories and present choices. *Journal of Quantitative Criminology, 29*(2), 217-250.
261. Cipil, F. (2013). *Youth drug use in Turkey: A test of general strain theory* (Doctoral dissertation, Virginia Commonwealth University).
262. Eitle, T. M., Eitle, D., & Johnson-Jennings, M. (2013). General strain theory and substance use among American Indian adolescents. *Race and Justice, 3*(1), 3-30.
263. Hoskin, A. W. (2013). Experiencing prejudice and violence among Latinos: A general strain theory approach. *Western Criminology Review, 14*(1), 25-38.

264. Listwan, S. J., Sullivan, C. J., Agnew, R., Cullen, F. T., & Colvin, M. (2013). The pains of imprisonment revisited: The impact of strain on inmate recidivism. *Justice Quarterly*, 30(1), 144-168.
265. Moon, B., & Morash, M. (2013). General strain theory as a basis for the design of school interventions. *Crime & Delinquency*, 59(6), 886-909.
266. Ngo, F. T., & Paternoster, R. (2013). Stalking strain, concurrent negative emotions, and legitimate coping strategies: A preliminary test of gendered strain theory. *American Journal of Criminal Justice*, 38(3), 369-391.
267. Ngo, F. T., & Paternoster, R. (2013). Stalking, gender, and coping strategies: A partial test of Broidy and Agnew's gender/general strain theory hypotheses. *Victims & Offenders*, 8(1), 94-117.
268. Peck, J. H. (2013). Examining race and ethnicity in the context of general strain theory, depression, and delinquency. *Deviant Behavior*, 34(9), 706-726.
269. Peters, A. M., & Corrado, R. R. (2013). An examination of the early "strains" of imprisonment among young offenders incarcerated for serious crimes. *Journal of Juvenile Justice*, 2(2), 76-94.
270. Posick, C., Farrell, A., & Swatt, M. L. (2013). Do boys fight and girls cut? A general strain theory approach to gender and deviance. *Deviant Behavior*, 34(9), 685-705.
271. Radzali, F. M., Ahmad, A., & Omar, Z. (2013). Workload, job stress, family-to-work conflict and deviant workplace behavior. *International Journal of Academic Research in Business and Social Sciences*, 3(12), 109-121.
272. Scheurman, H. L. (2013). The relationship between injustice and crime: A general strain theory approach. *Journal of Criminal Justice*, 41(6), 375-385.
273. Smith, T. R., Langenbacher, M., Kudlac, C., & Fera, A. G. (2013). Deviant reactions to the college pressure cooker: A test of general strain theory on undergraduate students in the United States. *International Journal of Criminal Justice Sciences*, 8(2), 88-104.
274. Stogner, J. M., & Gibson, C. L. (2013). Stressful life events and adolescent drug use: Moderating influences of the MAOA gene. *Journal of Criminal Justice*, 41(5), 357-363.
275. Turanovic, J. J., & Pratt, T. C. (2013). The consequences of maladaptive coping: Integrating general strain and self-control theories to specify a causal pathway between victimization and offending. *Journal of Quantitative Criminology*, 29(3), 321-345.
276. Watts, S. J., & McNulty, T. L. (2013). Childhood abuse and criminal behavior: Testing a general strain theory model. *Journal of Interpersonal Violence*, 28(15), 3023-3040.

277. Williams, A. (2013). Personality as a moderator of the relationship between stress and academic deviance. *Modern Psychological Studies*, 19(1), 83-97.
278. Wulf-Ludden, T. L. (2013). *Pseudo-families and institutional misconduct in a women's prison: A test of general strain theory* (Doctoral dissertation, University of Nebraska at Omaha).
279. Wright, M. F., & Li, Y. (2013). The association between cyber victimization and subsequent cyber aggression: The moderating effect of peer rejection. *Journal of Youth and Adolescence*, 42(5), 662-674.
280. Zavala, E., & Spohn, R. E. (2013). The role of vicarious and anticipated strain on the overlap of violent perpetration and victimization: A test of general strain theory. *American Journal of Criminal Justice*, 38(1), 119-140.

## 2014

281. Bao, W. N., Haas, A., Chen, X., & Pi, Y. (2014). Repeated strains, social control, social learning, and delinquency: Testing an integrated model of general strain theory in China. *Youth & Society*, 46(3), 402-424.
282. Bishopp, S. A., & Boots, D. P. (2014). General strain theory, exposure to violence, and suicide ideation among police officers: A gendered approach. *Journal of Criminal Justice*, 42(6), 538-548.
283. Cheung, Y. W., Choi, S. Y., & Cheung, A. K. (2014). Strain, self-control, and spousal violence: A study of husband-to-wife violence in Hong Kong. *Violence and Victims*, 29(2), 280-299.
284. Dang, D. (2014). Predicting insider's malicious security behaviours: A general strain theory-based conceptual model. In *CONF-IRM 2014* (pp. 1-11). New York: Association for Information Systems.
285. DeSoto, W., Tajalli, H., Smith, C. L., & Pino, N. W. (2014). College students and alcohol abuse: A test of social learning, strain, and acculturation theories. *World Medical & Health Policy*, 6(3), 262-279.
286. Ford, J. A. (2014). Poor health, strain, and substance use. *Deviant Behavior*, 35(8), 654-667.
287. Francis, K. A. (2014). General strain theory, gender, and the conditioning influence of negative internalizing emotions on youth risk behaviors. *Youth Violence and Juvenile Justice*, 12(1), 58-76.
288. Grothoff, G. E., Kempf-Leonard, K., & Mullins, C. (2014). Gender and juvenile drug abuse: A general strain theory perspective. *Women & Criminal Justice*, 24(1), 22-43.

289. Jagers, J., Tomek, S., Bolland, K. A., Church II, W. T., Hooper, L. M., & Bolland, J. M. (2014). Personal and anticipated strain among youth: A longitudinal analysis of delinquency. *Journal of Juvenile Justice*, 3(2), 38-54.
290. Jang, H., Song, J., & Kim, R. (2014). Does the offline bully-victimization influence cyberbullying behavior among youths? Application of general strain theory. *Computers in Human Behavior*, 31, 85-93.
291. Keith, S. (2014). How does self-complexity of identity moderate the relationship between strain and crime? *Deviant Behavior*, 35(10), 759-781.
292. Kenney, J. L. (2014). *Understanding the arrest experiences of women with co-occurring substance abuse and posttraumatic stress disorders: An application of general strain theory* (Doctoral dissertation, Columbia University).
293. Lee J., & Lee, S. S. (2014). The effect of cyber victimization on cyber offending and gender differences in testing a general strain theory. *Studies on Korean Youth*.
294. Lin, W. H., Dembo, R., Sellers, C. S., Cochran, J., & Mieczkowski, T. (2014). Strain, negative emotions, and juvenile delinquency: the United States versus Taiwan. *International Journal of Offender Therapy and Comparative Criminology*, 58(4), 412-434.
295. Moon, B., & Jang, S. J. (2014). A general strain approach to psychological and physical bullying: A study of interpersonal aggression at school. *Journal of Interpersonal Violence*, 29(12), 2147-2171.
296. Ngo, F. T., & Paternoster, R. (2014). Contemporaneous and lagged effects of life domains and substance use: a test of Agnew's general theory of crime and delinquency. *Journal of Criminology*, Article ID 320486.
297. Özbay, Ö. (2014). General strain theory and substance use. *Turkish Journal of Police Studies*, 16(1), 81-102.
298. Ruppert, M. S. (2014). *Self-efficacy, conventional cognitive coping, and the strain-delinquency relationship: A test of general strain theory* (Doctoral dissertation, University of Iowa).
299. Santoro, W. A., & Broidy, L. (2014). Gendered rioting: A general strain theoretical approach. *Social Forces*, 93(1), 329-354.
300. Spohn, R. E., & Wood, S. D. (2014). Spare the rod, endanger the child? Strain, race/ethnicity, and serious delinquency. *Journal of Ethnicity in Criminal Justice*, 12(3), 159-193.



301. Totura, C. M. W., Karver, M. S., & Gesten, E. L. (2014). Psychological distress and student engagement as mediators of the relationship between peer victimization and achievement in middle school youth. *Journal of Youth and Adolescence, 43*(1), 40-52.
302. Yun, M., Kim, E., & Morris, R. (2014). Gendered pathways to delinquency: An examination of general strain theory among South Korean youth. *Youth Violence and Juvenile Justice, 12*(3), 268-292.

## 2015

303. Bergsma, T. W. (2015). *General strain theory as a predictor of occupational fraud* (Doctoral dissertation, Walden University).
304. Bucher, J., Manasse, M., & Milton, J. (2015). Soliciting strain: examining both sides of street prostitution through general strain theory. *Journal of Crime and Justice, 38*(4), 435-453.
305. Cheung, N. W. (2015). Social strain, couple dynamics and gender differences in gambling problems: Evidence from Chinese married couples. *Addictive Behaviors, 41*, 175-184.
306. Connolly, E. J., & Beaver, K. M. (2015). Assessing the salience of gene-environment interplay in the development of anger, family conflict, and physical violence: a biosocial test of general strain theory. *Journal of Criminal Justice, 43*(6), 487-497.
307. Darno, D. D. (2015). *Comparing strain at a residential and a commuter campus: A test of general strain theory* (Doctoral dissertation, Indiana University of Pennsylvania).
308. James, K., Bunch, J., & Clay-Warner, J. (2015). Perceived injustice and school violence: An application of general strain theory. *Youth Violence and Juvenile Justice, 13*(2), 169-189.
309. Jang, S. J., & Song, J. (2015). A “rough test” of a delinquent coping process model of general strain theory. *Journal of Criminal Justice, 43*(6), 419-430.
310. Jun, S., & Choi, E. (2015). Academic stress and Internet addiction from general strain theory framework. *Computers in Human Behavior, 49*, 282-287.
311. May, D. C., Keith, S., Rader, N. E., & Dunaway, R. G. (2015). Predicting adolescent fear of crime through the lens of general strain theory. *Sociological Focus, 48*(2), 172-189.
312. Ousey, G. C., Wilcox, P., & Schreck, C. J. (2015). Violent victimization, confluence of risks and the nature of criminal behavior: Testing main and interactive effects from Agnew’s extension of general strain theory. *Journal of Criminal Justice, 43*(2), 164-173.
313. Puhmann, A. M. (2015). *Gender and general strain theory: An examination of the role of gendered strains and negative emotions on crime* (Doctoral dissertation, University of Miami).

314. Taylor, J., & Eitle, D. (2015). The moderating role of BIS/BAS personality tendencies in the relationship between general strain and crime. *Deviant Behavior*, 36(11), 874-889.
315. Thompson, J. (2015). *General strain theory and bullying victimization: Do parental support and control alleviate the negative effects of bullying?* (Doctoral dissertation, University of South Carolina).
316. Vogel, M., & Keith, S. (2015). Vicarious peer victimization and adolescent violence: Unpacking the effects of social learning, general strain, and peer group selection. *Deviant Behavior*, 36(10), 834-852.
317. Walton, I. N., Dawson-Edwards, C., & Higgins, G. E. (2015). General strain theory and collegiate drinking patterns among African American female students. *American Journal of Criminal Justice*, 40(1), 169-182.
318. Xi, C. (2015). *Strain, family socioeconomic status, and delinquency among migrant adolescents in China: A multilevel model of general strain theory* (Doctoral dissertation, Chinese University of Hong Kong).
319. Yun, I., & Lee, C. H. (2015). Hazardous alcohol use among South Korean police officers: Examining predictions from general strain theory. *International Journal of Law, Crime and Justice*, 43(2), 194-213.
320. Zweig, J. M., Yahner, J., Visher, C. A., & Lattimore, P. K. (2015). Using general strain theory to explore the effects of prison victimization experiences on later offending and substance use. *The Prison Journal*, 95(1), 84-113.

## 2016

321. Baker, T., & Pelfrey, W. V. (2016). Bullying victimization, social network usage, and delinquent coping in a sample of urban youth: Examining the predictions of general strain theory. *Violence and Victims*, 31(6), 1021-1043.
322. Barbieri, N. (2016). *Examining general strain theory: Using subjective and objective measures of academic strain to predict delinquency and substance use* (Doctoral dissertation, University of Texas at Dallas).
323. Barrera, D.J., Gaga-a, B., & Pabayos, J. (2016). Negative life events and maladaptive behaviors among Filipino adolescents: An empirical test of the general strain theory. *Asian Journal of Criminology* 11(4): 265-287.
324. Button, D. M. (2016). Understanding the effects of victimization: Applying general strain theory to the experiences of LGBTQ youth. *Deviant Behavior*, 37(5), 537-556.

325. Eitle, D., & Eitle, T. M. (2016). General strain theory and delinquency: Extending a popular explanation to American Indian youth. *Youth & Society*, 48(4), 470-495.
326. Gao, Y., Wong, D. S., & Yu, Y. (2016). Maltreatment and delinquency in China: Examining and extending the intervening process of general strain theory. *International Journal of Offender Therapy and Comparative Criminology*, 60(1), 38-61.
327. Hoffmann, J. P. (2016). Cumulative stress and substance use from early adolescence to emerging adulthood. *Journal of Drug Issues*, 46(3), 267-288.
328. Link, N. W., Cullen, F. T., Agnew, R., & Link, B. G. (2016). Can general strain theory help us understand violent behaviors among people with mental illnesses? *Justice Quarterly*, 33(4), 729-754.
329. Lowe, N. C. (2016). *Examining the strain-crime relationships among African-American women: An empirical test of Agnew's general strain theory* (Doctoral dissertation, University of Kentucky).
330. McNeal, B. A. (2016). *An application of general strain theory to recidivism in Arkansas* (Doctoral dissertation, University of Arkansas at Little Rock).
331. Ngo, F. T., & Paternoster, R. (2016). Toward an understanding of the emotional and behavioral reactions to stalking: A partial test of general strain theory. *Crime & Delinquency*, 62(6), 703-727.
332. Reid, J. A., & Piquero, A. R. (2016). Applying general strain theory to youth commercial sexual exploitation. *Crime & Delinquency*, 62(3), 341-367.
333. Scott, K. (2016). *Male-to-female domestic violence - the nature and prevalence of psychological abuse and physical abuse: A test of an integrated model of Johnson's theory of intimate partner violence and Agnew's general strain theory of crime* (Doctoral dissertation, Howard University).
334. Smischney, T. (2016). *Examining the impact of cyberbullying victimization in a postsecondary institution: Utilizing general strain theory to explain the use of negative coping mechanisms* (Doctoral dissertation, Michigan State University).
335. Snyder, S. M., Hartinger-Saunders, R., Brezina, T., Beck, E., Wright, E. R., Forge, N., & Bride, B. E. (2016). Homeless youth, strain, and justice system involvement: An application of general strain theory. *Children and Youth Services Review*, 62, 90-96.
336. Steele, J. L. (2016). Race and general strain theory: Examining the impact of racial discrimination and fear on adolescent marijuana and alcohol use. *Substance Use & Misuse*, 51(12), 1637-1648.
337. Wulf-Ludden, T. (2016). Pseudofamilies, Misconduct, and the Utility of General Strain Theory in a Women's Prison. *Women & Criminal Justice*, 26(4), 233-259.

## 2017

338. Botchkovar, E. V., Antonaccio, O., & Hughes, L. A. (2017). Neighbourhood disorder, collective sentiments and personal strain: Bringing neighbourhood context into general strain theory. *British Journal of Criminology*, doi: 10.1093/bjc/azx023.
339. Barbieri, N., & Connell, N. M. (2017). Examining general strain: Using subjective and objective measures of academic strain to predict delinquency. *Journal of Ethnicity in Criminal Justice*, 15(4), 330-348.
340. Barbieri, N., & Craig, J. M. (2017). Do the effects of strain and religiosity on criminal coping differ by race and ethnicity? *Crime & Delinquency*, doi: 0011128717698058.
341. Bunch, J. M., Iratzoqui, A., & Watts, S. J. (2017). Child abuse, self-control, and delinquency: A general strain perspective. *Journal of Criminal Justice*. doi: 10.1016/j.jcrimjus.2017.09.009.
342. Button, D. M., & Worthen, M. G. (2017). Applying a general strain theory framework to understand school weapon carrying among LGBT and heterosexual youth. *Criminology*, 55(4), 806-832.
343. Caver, L. (2017). *A critical examination of the general strain theory: The application of discrimination as a strain and its relationship to criminal behavior and mental health in an African American sample* (Doctoral dissertation, Saint Louis University).
344. Cottrell, C. J. (2017). *Applying general strain theory to explain racial and ethnic differences in the relationship between school suspension and delinquency in adolescence* (Doctoral dissertation, Howard University).
345. Cudmore, R. M. (2017). *The role of cultural variables in the victimization-delinquency overlap among Latino youth: A general strain theory perspective* (Doctoral dissertation, Northeastern University).
346. Craig, J. M., Cardwell, S. M., & Piquero, A. R. (2017). The effects of criminal propensity and strain on later offending. *Crime & Delinquency*, 63(13), 1655-1681.
347. Cudmore, R. M., Cuevas, C. A., & Sabina, C. (2017). The impact of polyvictimization on delinquency among Latino adolescents: A general strain theory perspective. *Journal of Interpersonal Violence*, 32(17), 2647-2667.
348. Davidowitz, K. (2017). *The evolution of general strain theory: A comprehensive review and test of Robert Agnew's 2002 extension* (Doctoral dissertation, Florida Atlantic University).
349. De Coster, S., & Thompson, M. S. (2017). Race and general strain theory: Microaggressions as mundane extreme environmental stresses. *Justice Quarterly*, 34(5), 903-930.

350. Dolliver, M. J., & Rucker, D. L. (2017). Addressing a divide in the conceptualization of the gender-crime relationship: A comparative test of gender and sex using general strain theory. *Deviant Behavior*, doi: 10.1080/01639625.2017.1410619.
351. Greco, R., & Curci, A. (2017). Does the general strain theory explain gambling and substance use? *Journal of Gambling Studies*, 33(3), 919-936.
352. Huck, J. L., Spraitz, J. D., Bowers Jr, J. H., & Morris, C. S. (2017). Connecting opportunity and strain to understand deviant behavior: a test of general strain theory. *Deviant Behavior*, 38(9), 1009-1026.
353. Iratzoqui, A. (2017). A gendered model of lifetime experiences of strain. *Youth & Society*, doi: 0044118X17736328.
354. Jochman, J. C., Cheadle, J. E., & Goosby, B. J. (2017). Do adolescent risk behaviors mediate health and school bullying? Testing the stress process and general strain frameworks. *Social Science Research*, 65, 195-209.
355. Kort-Butler, L. A. (2017). Health-related strains and subsequent delinquency and marijuana use. *Youth & Society*, 49(8), 1077-1103.
356. Lee, Y., & Kim, J. (2017). Examining the gendered effect of experienced and vicarious victimization: A general strain theory perspective. *American Journal of Criminal Justice*, doi: 10.1007/s12103-017-9402-x.
357. Martinez, B. C. (2017). General strain theory, religiosity, and delinquency among young Latino Americans. *Deviant Behavior*, 38(11), 1223-1239.
358. Mier, C. (2017). *Where there's smoke, is there always fire? Exploring the relationship between substance-related health strain and criminal arrest in a partial test of general strain theory* (Doctoral dissertation, Florida State University).
359. Moon, B., & Morash, M. (2017). A test of general strain theory in South Korea: A focus on objective/subjective strains, negative emotions, and composite conditioning factors. *Crime & Delinquency*, 63(6), 731-756.
360. Moon, B., & Morash, M. (2017). Gender and general strain theory: A comparison of strains, mediating, and moderating effects explaining three types of delinquency. *Youth & Society*, 49(4), 484-504.
361. Mubarak, A. R., & Quinn, S. (2017). General strain theory of Internet addiction and deviant behaviour in social networking sites (SNS). *Journal of Information, Communication and Ethics in Society*, doi: 10.1108/JICES-08-2016-0024.

362. Niño, M., Ignatow, G., & Cai, T. (2017). Social isolation, strain, and youth violence. *Youth Violence and Juvenile Justice*, 15(3), 299-313.
363. Orak, U., & Solakoglu, O. (2017). Alcohol consumption among Turkish adolescents: An empirical test of general strain theory. *Journal of Child & Adolescent Substance Abuse*, 26(4), 293-302.
364. Silva, H. M. S., & Ranasinghe, R. M. I. D. (2017). The impact of job stress on deviant workplace behaviour: A study of operational level employees of comfort apparel solutions company in Sri Lanka. *International Journal of Human Resource Studies*, 7(1), 74-85.
365. Stoll, K. A. (2017). *Exploring the role of internalizing problems between strain theory and juvenile delinquency* (Doctoral dissertation, The University of Arizona).
366. **Thaxton, S., & Agnew, R. (2017). When criminal coping is likely: An examination of conditioning effects in general strain theory. *Journal of Quantitative Criminology*, doi: 10.1007/s10940-017-9358-5.**
367. Yun, M., & Kim, E. (2017). Does gender matter in explaining delinquency and suicidal thoughts? An examination of general strain theory in South Korean youths. *Journal of Interpersonal Violence*, doi: 0886260517713222.
368. Walters, G. D., & Espelage, D. L. (2017). Mediating the bullying-victimization relationship with anger and cognitive impulsivity: A test of general strain and criminal lifestyle theories. *Journal of Criminal Justice*, 53, 66-73.
369. Willits, D. (2017). Violent propensity, strain, and violent intentions: A test of Agnew's revised conditioning hypothesis. *Deviant Behavior*, doi: 10.1080/01639625.2017.1411046.
370. Wolff, K. T., & Baglivio, M. T. (2017). Adverse childhood experiences, negative emotionality, and pathways to juvenile recidivism. *Crime & Delinquency*, 63(12), 1495-1521.
371. Zavala, E. (2017). A multi-theoretical framework to explain same-sex intimate partner violence perpetration and victimization: A test of social learning, strain, and self-control. *Journal of Crime and Justice*, 40(4), 478-496.
372. Zhang, J., Liu, J., Wang, X., & Zou, A. (2017). Life stress, strain, and deviance across schools: testing the contextual version of general strain theory in China. *International Journal of Offender Therapy and Comparative Criminology*, doi: 0306624X17720182.

## 2018

373. Baek, H., Roberts, A. M., & Higgins, G. E. (2018). The impact of family indifference on delinquency among American Indian youth: A test of general strain theory. *Journal of Ethnicity in Criminal Justice*, 16(1), 57-75.

374. Baron, S. W. (2018). Strain, criminal propensity, and violence: Examining the role of composite moderator in Agnew's extension of GST. *Crime & Delinquency*, doi: 10.1177/0011128718787511.
375. Broidy, L., & Santoro, W. A. (2018). General strain theory and racial insurgency: Assessing the role of legitimate coping. *Justice Quarterly*, 35(1), 162-189.
376. Dario, L. M., & O'Neal, E. N. (2018). Do the mental health consequences of sexual victimization differ between males and females? A general strain theory approach. *Women & Criminal Justice*, 28(1), 19-42.
377. Fore, S. M. (2018). *The relationship between adverse childhood experiences and juvenile deviance in Arizona* (Doctoral dissertation, Grand Canyon University).
378. Gao, Y., & Wong, D. S. (2018). Strains and delinquency of migrant adolescents in China: An investigation from the perspective of general strain theory. *Youth & Society*, 50(4), 506-528.
379. Glassner, S. D., & Cho, S. (2018). Bullying victimization, negative emotions, and substance use: Utilizing general strain theory to examine the undesirable outcomes of childhood bullying victimization in adolescence and young adulthood. *Journal of Youth Studies*, doi: 10.1080/13676261.2018.1461200.
380. Hoffmann, J. P. (2018). Marijuana use and depressive symptoms among young people: Examining unidirectional and bidirectional effects." *Health*, 10(8), 1066-1078
381. Kim, J., Siennick, S. E., & Hay, C. (2018). The impact of strain on self-control: A longitudinal study of Korean adolescents. *Youth & Society*, doi: 10.1177/0044118X18773593.
382. Lianos, H., & McGrath, A. (2018). Can the general theory of crime and general strain theory explain cyberbullying perpetration? *Crime & Delinquency*, doi: 0011128717714204.
383. Paez, G. R. (2018). Cyberbullying among adolescents: A general strain theory perspective. *Journal of School Violence*, 17(1), 74-85.
384. Peck, J. H., Childs, K. K., Jennings, W. G., & Brady, C. M. (2018). General strain theory, depression, and substance use: Results from a nationally representative, longitudinal sample of White, African-American, and Hispanic adolescents and young adults. *Journal of Child & Adolescent Substance Abuse*, 27(1), 11-28.
385. Pedalano, J., & Frailing, K. (2018). General strain theory and prescription drug misuse among honors students. *Journal of the National Collegiate Honors Council*, 19(1), 85-103.
386. Roh, M., & Marshall, I. (2018). A cross-cultural analysis of Agnew's general theory of crime and delinquency. *Social Science and Humanities Journal*, 2(1), 301-321.

387. Shadmanfaat, S. M., Cochran, J. K., Muniz, C. N., & Kabiri, S. (2018). Soccer hooliganism in Iran: A test of Agnew's general strain theory. *Deviant Behavior*, doi: 10.1080/01639625.2018.1431136.
388. Wemmers, J. A., Cyr, K., Chamberland, C., Lessard, G., Collin-Vézina, D., & Clément, M. E. (2018). From victimization to criminalization: General strain theory and the relationship between poly-victimization and delinquency. *Victims & Offenders*, 13(4), 542-557.
389. Wojciechowski, T. W. (2018). Victimization recency, development of anger, and violent offending in early adulthood: A developmental test of general strain theory. *Deviant Behavior*, doi: 10.1080/01639625.2018.1443766.
390. Yang, F. (2018). *Immigration status, peer victimization, and negative emotions as they relate to bullying behavior among school-aged children* (Doctoral dissertation, University of Alabama).
391. Zapolski, T. C., Banks, D. E., Lau, K. S., & Aalsma, M. C. (2018). Perceived police injustice, moral disengagement, and aggression among juvenile offenders: Utilizing the general strain theory model. *Child Psychiatry & Human Development*, 49(2), 290-297.
